# Supplementary material for: UV-Vis spectrophotometric determination of rare earth elements (REE) speciation at near-neutral to alkaline pH. Part II: hydrolysis of Er from 25 to 75 °C
Source: Royal Society of Chemistry journal article supplement (doi:10.1039/d4dt03037k), 2025-01-01
Supplement: d4dt03037k1.pdf [file d4dt03037k1.pdf]

1 **Table S1.** Compositions of the experimental solutions and measured absorbance from UV-Vis spectrophotometric experiments of Er-absent and -bearing  
 2 *m*CP-NaOH solutions with addition of varying ErCl<sub>3</sub> concentrations to ~0.253 mmol/kg at temperatures from 35 to 75 °C. The pH by UV-Vis (Eqn. 1)  
 3 as determined by the absorbance intensities ratio (*R*) of I<sup>2-</sup> to HI<sup>-</sup>. The average ligand number reflects the OH<sup>-</sup> coordinated to Er<sup>3+</sup> by averaging each  
 4 contributing hydroxyl species.

| Exp     | <i>T</i> (°C) | NaOH<br>(mmol/kg) | Er<br>(mmol/kg) | <i>m</i> CP<br>(mmol/kg) | Abs <sub>HI-</sub> | Abs <sub>I2-</sub> | <i>R</i> | pH by potentiometric<br>measurement | pH by<br>UV-Vis | average ligand<br>number |
|---------|---------------|-------------------|-----------------|--------------------------|--------------------|--------------------|----------|-------------------------------------|-----------------|--------------------------|
| Er-a-0  | 35            | 0.448             | 0.000           | 0.029                    | 0.0798             | 1.1100             | 13.91    | -                                   | 10.05           | -                        |
| Er-a-1  | 35            | 0.449             | 0.023           | 0.029                    | 0.0839             | 1.1070             | 13.19    | -                                   | 9.93            | 2.48                     |
| Er-a-2  | 35            | 0.448             | 0.046           | 0.029                    | 0.0867             | 1.0950             | 12.64    | -                                   | 9.85            | 1.91                     |
| Er-a-3  | 35            | 0.448             | 0.068           | 0.029                    | 0.0945             | 1.0680             | 11.30    | -                                   | 9.68            | 1.98                     |
| Er-a-4  | 35            | 0.447             | 0.091           | 0.029                    | 0.1250             | 0.9754             | 7.81     | -                                   | 9.30            | 2.14                     |
| Er-a-5  | 35            | 0.449             | 0.113           | 0.029                    | 0.2824             | 0.4793             | 1.70     | -                                   | 8.41            | 2.17                     |
| Er-a-6  | 35            | 0.445             | 0.136           | 0.029                    | 0.3424             | 0.2252             | 0.66     | -                                   | 7.97            | 1.87                     |
| Er-a-7  | 35            | 0.445             | 0.158           | 0.029                    | 0.3625             | 0.1958             | 0.54     | -                                   | 7.88            | 1.63                     |
| Er-a-8  | 35            | 0.449             | 0.181           | 0.029                    | 0.3785             | 0.1697             | 0.45     | -                                   | 7.80            | 1.42                     |
| Er-a-9  | 35            | 0.445             | 0.204           | 0.029                    | 0.3870             | 0.1531             | 0.40     | -                                   | 7.74            | 1.26                     |
| Er-a-10 | 35            | 0.447             | 0.227           | 0.029                    | 0.4139             | 0.1318             | 0.32     | -                                   | 7.64            | 1.14                     |
| Er-b-0  | 35            | 0.449             | 0.000           | 0.029                    | 0.0770             | 1.108              | 14.39    | -                                   | 10.14           | -                        |
| Er-b-1  | 35            | 0.448             | 0.045           | 0.029                    | 0.0847             | 1.090              | 12.86    | -                                   | 9.88            | 2.98                     |
| Er-b-2  | 35            | 0.449             | 0.067           | 0.029                    | 0.0939             | 1.069              | 11.38    | -                                   | 9.69            | 2.83                     |
| Er-b-3  | 35            | 0.451             | 0.089           | 0.029                    | 0.1189             | 0.9978             | 8.39     | -                                   | 9.36            | 2.74                     |
| Er-b-4  | 35            | 0.448             | 0.101           | 0.029                    | 0.1829             | 0.8295             | 4.54     | -                                   | 8.93            | 2.79                     |
| Er-b-5  | 35            | 0.450             | 0.111           | 0.029                    | 0.2502             | 0.5849             | 2.34     | -                                   | 8.57            | 2.68                     |
| Er-b-6  | 35            | 0.448             | 0.133           | 0.029                    | 0.3485             | 0.2231             | 0.64     | -                                   | 7.96            | 2.36                     |
| Er-b-7  | 35            | 0.448             | 0.155           | 0.029                    | 0.3441             | 0.2106             | 0.61     | -                                   | 7.94            | 2.02                     |
| Er-b-8  | 35            | 0.448             | 0.179           | 0.029                    | 0.3637             | 0.1888             | 0.52     | -                                   | 7.86            | 1.76                     |
| Er-b-9  | 35            | 0.450             | 0.199           | 0.029                    | 0.3815             | 0.1685             | 0.44     | -                                   | 7.79            | 1.58                     |
| Er-b-10 | 35            | 0.449             | 0.223           | 0.029                    | 0.3934             | 0.1511             | 0.38     | -                                   | 7.73            | 1.42                     |
| Er-c-0  | 35            | 0.445             | 0.000           | 0.030                    | 0.0764             | 1.082              | 14.17    | -                                   | 10.10           | -                        |

|         |    |       |       |       |        |        |       |   |       |      |
|---------|----|-------|-------|-------|--------|--------|-------|---|-------|------|
| Er-c-1  | 35 | 0.446 | 0.044 | 0.030 | 0.0747 | 1.068  | 14.29 | - | 10.12 | -    |
| Er-c-2  | 35 | 0.444 | 0.067 | 0.030 | 0.0799 | 1.038  | 13.00 | - | 9.90  | -    |
| Er-c-3  | 35 | 0.444 | 0.089 | 0.030 | 0.1067 | 0.9597 | 9.00  | - | 9.43  | 2.35 |
| Er-c-4  | 35 | 0.444 | 0.100 | 0.030 | 0.1535 | 0.8121 | 5.29  | - | 9.03  | 2.46 |
| Er-c-5  | 35 | 0.444 | 0.106 | 0.030 | 0.2573 | 0.5847 | 2.27  | - | 8.56  | 2.52 |
| Er-c-6  | 35 | 0.444 | 0.112 | 0.030 | 0.2538 | 0.4850 | 1.91  | - | 8.47  | 2.43 |
| Er-c-7  | 35 | 0.440 | 0.122 | 0.030 | 0.3110 | 0.2486 | 0.80  | - | 8.06  | 2.31 |
| Er-c-8  | 35 | 0.443 | 0.134 | 0.030 | 0.3283 | 0.2069 | 0.63  | - | 7.95  | 2.11 |
| Er-c-9  | 35 | 0.444 | 0.156 | 0.030 | 0.3479 | 0.1855 | 0.53  | - | 7.87  | 1.82 |
| Er-c-10 | 35 | 0.444 | 0.179 | 0.030 | 0.3554 | 0.1669 | 0.47  | - | 7.82  | 1.59 |
| Er-c-11 | 35 | 0.443 | 0.201 | 0.030 | 0.3650 | 0.1548 | 0.42  | - | 7.77  | 1.42 |
| Er-c-12 | 35 | 0.443 | 0.224 | 0.030 | 0.3892 | 0.1219 | 0.31  | - | 7.63  | 1.28 |
| Er-c-13 | 35 | 0.443 | 0.246 | 0.030 | 0.4078 | 0.1067 | 0.26  | - | 7.55  | 1.17 |
| Er-d-0  | 35 | 0.443 | 0.000 | 0.030 | 0.0757 | 1.078  | 14.24 | - | 10.11 | -    |
| Er-d-1  | 35 | 0.442 | 0.044 | 0.030 | 0.0788 | 1.058  | 13.43 | - | 9.97  | -    |
| Er-d-2  | 35 | 0.445 | 0.067 | 0.030 | 0.0856 | 1.040  | 12.15 | - | 9.78  | 2.17 |
| Er-d-3  | 35 | 0.442 | 0.090 | 0.030 | 0.1209 | 0.9471 | 7.84  | - | 9.30  | 2.58 |
| Er-d-4  | 35 | 0.444 | 0.101 | 0.030 | 0.1647 | 0.8060 | 4.89  | - | 8.98  | 2.56 |
| Er-d-5  | 35 | 0.444 | 0.105 | 0.030 | 0.2047 | 0.6956 | 3.40  | - | 8.77  | 2.55 |
| Er-d-6  | 35 | 0.444 | 0.111 | 0.030 | 0.2818 | 0.4701 | 1.67  | - | 8.40  | 2.53 |
| Er-d-7  | 35 | 0.444 | 0.117 | 0.030 | 0.3546 | 0.2496 | 0.70  | - | 8.00  | 2.48 |
| Er-d-8  | 35 | 0.443 | 0.123 | 0.030 | 0.3573 | 0.2058 | 0.58  | - | 7.91  | 2.38 |
| Er-d-9  | 35 | 0.443 | 0.134 | 0.030 | 0.3780 | 0.1651 | 0.44  | - | 7.78  | 2.19 |
| Er-d-10 | 35 | 0.444 | 0.157 | 0.030 | 0.3927 | 0.1397 | 0.36  | - | 7.69  | 1.88 |
| Er-d-11 | 35 | 0.442 | 0.179 | 0.030 | 0.4075 | 0.1163 | 0.29  | - | 7.59  | 1.65 |
| Er-d-12 | 35 | 0.443 | 0.202 | 0.030 | 0.4194 | 0.0987 | 0.24  | - | 7.51  | 1.47 |
| Er-d-13 | 35 | 0.443 | 0.222 | 0.030 | 0.4348 | 0.0818 | 0.19  | - | 7.40  | 1.33 |
| Er-d-14 | 35 | 0.444 | 0.244 | 0.030 | 0.4402 | 0.0747 | 0.17  | - | 7.36  | 1.22 |
| Er-e-0  | 35 | 0.442 | 0.000 | 0.030 | 0.0753 | 1.078  | 14.31 | - | 10.13 | -    |
| Er-e-1  | 35 | 0.441 | 0.045 | 0.030 | 0.0797 | 1.059  | 13.28 | - | 9.94  | 2.15 |
| Er-e-2  | 35 | 0.444 | 0.067 | 0.030 | 0.0886 | 1.042  | 11.77 | - | 9.73  | 2.49 |
| Er-e-3  | 35 | 0.444 | 0.089 | 0.030 | 0.1176 | 0.9564 | 8.13  | - | 9.34  | 2.65 |

|         |    |       |       |       |        |        |       |       |       |      |
|---------|----|-------|-------|-------|--------|--------|-------|-------|-------|------|
| Er-e-4  | 35 | 0.444 | 0.100 | 0.030 | 0.1684 | 0.8050 | 4.78  | -     | 8.96  | 2.67 |
| Er-e-5  | 35 | 0.444 | 0.107 | 0.030 | 0.2256 | 0.6428 | 2.85  | -     | 8.67  | 2.63 |
| Er-e-6  | 35 | 0.444 | 0.111 | 0.030 | 0.2870 | 0.4453 | 1.55  | -     | 8.37  | 2.61 |
| Er-e-7  | 35 | 0.445 | 0.117 | 0.030 | 0.3619 | 0.2474 | 0.68  | -     | 7.99  | 2.57 |
| Er-e-8  | 35 | 0.444 | 0.123 | 0.030 | 0.3538 | 0.2085 | 0.59  | -     | 7.92  | 2.45 |
| Er-e-9  | 35 | 0.443 | 0.134 | 0.030 | 0.4168 | 0.1187 | 0.28  | -     | 7.59  | 2.27 |
| Er-e-10 | 35 | 0.444 | 0.156 | 0.030 | 0.4139 | 0.1122 | 0.27  | -     | 7.57  | 1.94 |
| Er-e-11 | 35 | 0.444 | 0.178 | 0.030 | 0.4193 | 0.1063 | 0.25  | -     | 7.54  | 1.71 |
| Er-e-12 | 35 | 0.444 | 0.200 | 0.030 | 0.4333 | 0.0899 | 0.21  | -     | 7.45  | 1.52 |
| Er-e-13 | 35 | 0.444 | 0.223 | 0.030 | 0.4485 | 0.0633 | 0.14  | -     | 7.27  | 1.37 |
| Er-e-14 | 35 | 0.444 | 0.245 | 0.030 | 0.4612 | 0.0505 | 0.11  | -     | 7.16  | 1.25 |
| Er-f-0  | 35 | 0.446 | 0.000 | 0.030 | 0.0781 | 1.100  | 14.07 | 10.15 | 10.08 | -    |
| Er-f-1  | 35 | 0.445 | 0.051 | 0.030 | 0.1057 | 1.084  | 10.25 | 9.93  | 9.56  | 3.43 |
| Er-f-2  | 35 | 0.446 | 0.076 | 0.030 | 0.1253 | 1.059  | 8.45  | 9.51  | 9.37  | 2.67 |
| Er-f-3  | 35 | 0.446 | 0.101 | 0.030 | 0.1660 | 0.9306 | 5.60  | 8.85  | 9.06  | 2.28 |
| Er-f-4  | 35 | 0.446 | 0.114 | 0.030 | 0.2465 | 0.6911 | 2.80  | 8.52  | 8.66  | 2.22 |
| Er-f-5  | 35 | 0.446 | 0.121 | 0.030 | 0.3573 | 0.4012 | 1.12  | 8.16  | 8.22  | 2.20 |
| Er-f-6  | 35 | 0.446 | 0.126 | 0.030 | 0.4092 | 0.2378 | 0.58  | 7.63  | 7.91  | 2.16 |
| Er-f-7  | 35 | 0.446 | 0.133 | 0.030 | 0.4583 | 0.1314 | 0.29  | 7.46  | 7.59  | 2.08 |
| Er-f-8  | 35 | 0.443 | 0.138 | 0.030 | 0.4558 | 0.1225 | 0.27  | 7.30  | 7.57  | 2.01 |
| Er-f-9  | 35 | 0.446 | 0.151 | 0.030 | 0.4483 | 0.1142 | 0.25  | 7.27  | 7.54  | 1.83 |
| Er-f-10 | 35 | 0.446 | 0.177 | 0.030 | 0.4670 | 0.0789 | 0.17  | 7.10  | 7.36  | 1.57 |
| Er-f-11 | 35 | 0.447 | 0.202 | 0.030 | 0.4728 | 0.0728 | 0.15  | 7.03  | 7.31  | 1.38 |
| Er-f-12 | 35 | 0.447 | 0.228 | 0.030 | 0.4843 | 0.0566 | 0.12  | 6.87  | 7.19  | 1.22 |
| Er-f-13 | 35 | 0.447 | 0.253 | 0.030 | 0.4872 | 0.0505 | 0.10  | 6.79  | 7.13  | 1.10 |
| Er-a-0  | 50 | 0.445 | 0.000 | 0.030 | 0.0850 | 0.9803 | 11.56 | 9.69  | 9.69  | -    |
| Er-a-1  | 50 | 0.445 | 0.049 | 0.030 | 0.0987 | 0.9251 | 9.38  | 9.39  | 9.42  | 2.56 |
| Er-a-2  | 50 | 0.445 | 0.076 | 0.030 | 0.1378 | 0.8493 | 6.16  | 8.83  | 9.07  | 2.78 |
| Er-a-3  | 50 | 0.446 | 0.101 | 0.030 | 0.2243 | 0.6167 | 2.75  | 8.48  | 8.58  | 2.58 |
| Er-a-4  | 50 | 0.444 | 0.113 | 0.030 | 0.3171 | 0.3562 | 1.12  | 8.20  | 8.14  | 2.47 |
| Er-a-5  | 50 | 0.444 | 0.121 | 0.030 | 0.4015 | 0.1310 | 0.33  | 7.67  | 7.57  | 2.42 |
| Er-a-6  | 50 | 0.445 | 0.126 | 0.030 | 0.4244 | 0.0544 | 0.13  | 7.28  | 7.15  | 2.35 |

|         |    |       |       |       |        |        |       |      |      |      |
|---------|----|-------|-------|-------|--------|--------|-------|------|------|------|
| Er-a-7  | 50 | 0.445 | 0.132 | 0.030 | 0.4416 | 0.0327 | 0.07  | 6.93 | 6.89 | 2.25 |
| Er-a-8  | 50 | 0.445 | 0.139 | 0.030 | 0.4462 | 0.0231 | 0.05  | 6.74 | 6.71 | 2.14 |
| Er-a-9  | 50 | 0.444 | 0.153 | 0.030 | 0.4434 | 0.0199 | 0.04  | 6.66 | 6.64 | 1.94 |
| Er-a-10 | 50 | 0.447 | 0.176 | 0.030 | 0.4522 | 0.0140 | 0.03  | 6.54 | 6.43 | 1.69 |
| Er-a-11 | 50 | 0.448 | 0.201 | 0.030 | 0.4527 | 0.0139 | 0.03  | 6.52 | 6.43 | 1.49 |
| Er-a-12 | 50 | 0.447 | 0.227 | 0.030 | 0.4585 | 0.0120 | 0.03  | 6.45 | 6.34 | 1.32 |
| Er-a-13 | 50 | 0.446 | 0.252 | 0.030 | 0.4520 | 0.0102 | 0.02  | 6.43 | 6.24 | 1.18 |
| Er-b-0  | 50 | 0.449 | 0.000 | 0.030 | 0.0850 | 0.9800 | 11.50 | 9.60 | 9.68 | -    |
| Er-b-1  | 50 | 0.454 | 0.050 | 0.030 | 0.1086 | 0.9422 | 8.67  | 9.35 | 9.34 | 2.88 |
| Er-b-2  | 50 | 0.450 | 0.077 | 0.030 | 0.1413 | 0.8466 | 5.99  | 9.02 | 9.05 | 2.72 |
| Er-b-3  | 50 | 0.450 | 0.101 | 0.030 | 0.2212 | 0.6446 | 2.91  | 8.67 | 8.61 | 2.50 |
| Er-b-4  | 50 | 0.452 | 0.114 | 0.030 | 0.3465 | 0.3211 | 0.93  | 8.05 | 8.05 | 2.45 |
| Er-b-5  | 50 | 0.450 | 0.119 | 0.030 | 0.3855 | 0.2159 | 0.56  | 7.43 | 7.82 | 2.37 |
| Er-b-6  | 50 | 0.449 | 0.126 | 0.030 | 0.4441 | 0.0621 | 0.14  | 6.94 | 7.19 | 2.31 |
| Er-b-7  | 50 | 0.451 | 0.133 | 0.030 | 0.4445 | 0.0371 | 0.08  | 6.71 | 6.95 | 2.20 |
| Er-b-8  | 50 | 0.450 | 0.139 | 0.030 | 0.4526 | 0.0265 | 0.06  | 6.64 | 6.77 | 2.11 |
| Er-b-9  | 50 | 0.450 | 0.151 | 0.030 | 0.4462 | 0.0296 | 0.07  | 6.65 | 6.83 | 1.93 |
| Er-b-10 | 50 | 0.451 | 0.177 | 0.030 | 0.4514 | 0.0218 | 0.05  | 6.53 | 6.67 | 1.65 |
| Er-b-11 | 50 | 0.451 | 0.201 | 0.030 | 0.4546 | 0.0170 | 0.04  | 6.47 | 6.54 | 1.46 |
| Er-b-12 | 50 | 0.449 | 0.228 | 0.030 | 0.4563 | 0.0151 | 0.03  | 6.41 | 6.47 | 1.29 |
| Er-b-13 | 50 | 0.452 | 0.253 | 0.030 | 0.4602 | 0.0134 | 0.03  | 6.39 | 6.40 | 1.16 |
| Er-c-0  | 50 | 0.445 | 0.000 | 0.030 | 0.0830 | 0.9716 | 11.70 | 9.70 | 9.71 | -    |
| Er-c-1  | 50 | 0.446 | 0.050 | 0.030 | 0.1154 | 0.9271 | 8.04  | 9.36 | 9.27 | 3.58 |
| Er-c-2  | 50 | 0.446 | 0.075 | 0.030 | 0.1508 | 0.8333 | 5.53  | 9.10 | 8.99 | 3.08 |
| Er-c-3  | 50 | 0.446 | 0.101 | 0.030 | 0.2688 | 0.5360 | 1.99  | 8.48 | 8.42 | 2.77 |
| Er-c-4  | 50 | 0.446 | 0.113 | 0.030 | 0.3781 | 0.2609 | 0.69  | 7.92 | 7.92 | 2.63 |
| Er-c-5  | 50 | 0.446 | 0.120 | 0.030 | 0.4124 | 0.1507 | 0.37  | 7.56 | 7.63 | 2.53 |
| Er-c-6  | 50 | 0.446 | 0.126 | 0.030 | 0.4406 | 0.0596 | 0.14  | 7.12 | 7.17 | 2.44 |
| Er-c-7  | 50 | 0.445 | 0.133 | 0.030 | 0.4485 | 0.0361 | 0.08  | 6.82 | 6.93 | 2.31 |
| Er-c-8  | 50 | 0.446 | 0.139 | 0.030 | 0.4479 | 0.0284 | 0.06  | 6.77 | 6.81 | 2.23 |

|         |    |       |       |       |        |        |       |      |      |      |
|---------|----|-------|-------|-------|--------|--------|-------|------|------|------|
| Er-c-9  | 50 | 0.448 | 0.150 | 0.030 | 0.4570 | 0.0217 | 0.05  | 6.65 | 6.67 | 2.06 |
| Er-c-10 | 50 | 0.447 | 0.176 | 0.030 | 0.4583 | 0.0167 | 0.04  | 6.53 | 6.53 | 1.76 |
| Er-c-11 | 50 | 0.444 | 0.203 | 0.030 | 0.4571 | 0.0146 | 0.03  | 6.46 | 6.45 | 1.53 |
| Er-c-12 | 50 | 0.446 | 0.226 | 0.030 | 0.4566 | 0.0144 | 0.03  | 6.42 | 6.44 | 1.37 |
| Er-c-13 | 50 | 0.446 | 0.252 | 0.030 | 0.4623 | 0.0136 | 0.03  | 6.37 | 6.41 | 1.23 |
| Er-d-0  | 50 | 0.445 | 0.000 | 0.030 | 0.0870 | 0.9989 | 11.52 | 9.77 | 9.69 | -    |
| Er-d-1  | 50 | 0.446 | 0.051 | 0.030 | 0.1074 | 0.9506 | 8.85  | 9.48 | 9.36 | 2.78 |
| Er-d-2  | 50 | 0.446 | 0.076 | 0.030 | 0.1287 | 0.8927 | 6.93  | 9.26 | 9.15 | 2.54 |
| Er-d-3  | 50 | 0.445 | 0.102 | 0.030 | 0.2169 | 0.6658 | 3.07  | 8.65 | 8.64 | 2.47 |
| Er-d-4  | 50 | 0.446 | 0.113 | 0.030 | 0.3129 | 0.4231 | 1.35  | 8.33 | 8.23 | 2.42 |
| Er-d-5  | 50 | 0.447 | 0.119 | 0.030 | 0.3701 | 0.2640 | 0.71  | 7.93 | 7.93 | 2.38 |
| Er-d-6  | 50 | 0.447 | 0.126 | 0.030 | 0.4065 | 0.1275 | 0.31  | 7.45 | 7.56 | 2.30 |
| Er-d-7  | 50 | 0.446 | 0.133 | 0.030 | 0.4239 | 0.0776 | 0.18  | 6.80 | 7.31 | 2.20 |
| Er-d-8  | 50 | 0.446 | 0.139 | 0.030 | 0.4328 | 0.0586 | 0.14  | 6.57 | 7.17 | 2.11 |
| Er-d-9  | 50 | 0.447 | 0.151 | 0.030 | 0.4313 | 0.0568 | 0.13  | 6.64 | 7.16 | 1.94 |
| Er-d-10 | 50 | 0.447 | 0.176 | 0.030 | 0.4470 | 0.0379 | 0.08  | 6.53 | 6.95 | 1.67 |
| Er-d-11 | 50 | 0.446 | 0.202 | 0.030 | 0.4542 | 0.0265 | 0.06  | 6.45 | 6.77 | 1.46 |
| Er-d-12 | 50 | 0.446 | 0.226 | 0.030 | 0.4533 | 0.0236 | 0.05  | 6.45 | 6.71 | 1.30 |
| Er-d-13 | 50 | 0.446 | 0.252 | 0.030 | 0.4572 | 0.0209 | 0.05  | 6.46 | 6.65 | 1.17 |
| Er-e-0  | 50 | 0.445 | 0.000 | 0.030 | 0.0850 | 0.9988 | 11.81 | 9.75 | 9.73 | -    |
| Er-e-1  | 50 | 0.445 | 0.051 | 0.030 | 0.1083 | 0.9330 | 8.62  | 9.47 | 9.34 | 3.44 |
| Er-e-2  | 50 | 0.446 | 0.076 | 0.030 | 0.1352 | 0.8821 | 6.52  | 9.15 | 9.11 | 3.00 |
| Er-e-3  | 50 | 0.446 | 0.102 | 0.030 | 0.2228 | 0.6556 | 2.94  | 8.61 | 8.62 | 2.76 |
| Er-e-4  | 50 | 0.447 | 0.113 | 0.030 | 0.3226 | 0.3966 | 1.23  | 8.15 | 8.18 | 2.66 |
| Er-e-5  | 50 | 0.446 | 0.120 | 0.030 | 0.3903 | 0.2197 | 0.56  | 7.33 | 7.82 | 2.60 |
| Er-e-6  | 50 | 0.443 | 0.131 | 0.030 | 0.4417 | 0.0628 | 0.14  | 6.95 | 7.20 | 2.43 |
| Er-e-7  | 50 | 0.446 | 0.133 | 0.030 | 0.4470 | 0.0594 | 0.13  | 6.36 | 7.16 | 2.40 |
| Er-e-8  | 50 | 0.446 | 0.139 | 0.030 | 0.4509 | 0.0421 | 0.09  | 6.24 | 7.00 | 2.30 |
| Er-e-9  | 50 | 0.445 | 0.152 | 0.030 | 0.4549 | 0.0339 | 0.07  | 6.27 | 6.89 | 2.10 |
| Er-e-10 | 50 | 0.445 | 0.178 | 0.030 | 0.4631 | 0.0260 | 0.06  | 6.24 | 6.75 | 1.80 |

|         |    |       |       |       |        |        |      |      |      |      |
|---------|----|-------|-------|-------|--------|--------|------|------|------|------|
| Er-e-11 | 50 | 0.446 | 0.202 | 0.030 | 0.4630 | 0.0221 | 0.05 | 6.29 | 6.67 | 1.59 |
| Er-e-12 | 50 | 0.446 | 0.227 | 0.030 | 0.4677 | 0.0223 | 0.05 | 6.25 | 6.67 | 1.42 |
| Er-e-13 | 50 | 0.446 | 0.252 | 0.030 | 0.4658 | 0.0173 | 0.04 | 6.24 | 6.54 | 1.27 |
| Er-a-0  | 50 | 0.445 | 0.000 | 0.030 | 0.1240 | 0.8595 | 6.91 | -    | 9.19 | -    |
| Er-a-1  | 75 | 0.445 | 0.050 | 0.030 | 0.1638 | 0.7712 | 4.71 | -    | 8.90 | 3.14 |
| Er-a-2  | 75 | 0.444 | 0.077 | 0.030 | 0.2065 | 0.6543 | 3.17 | -    | 8.66 | 2.97 |
| Er-a-3  | 75 | 0.448 | 0.100 | 0.030 | 0.2805 | 0.4639 | 1.65 | -    | 8.32 | 2.85 |
| Er-a-4  | 75 | 0.446 | 0.113 | 0.030 | 0.3521 | 0.2586 | 0.73 | -    | 7.93 | 2.80 |
| Er-a-5  | 75 | 0.445 | 0.120 | 0.030 | 0.3928 | 0.1408 | 0.36 | -    | 7.60 | 2.74 |
| Er-a-6  | 75 | 0.445 | 0.126 | 0.030 | 0.4084 | 0.0780 | 0.19 | -    | 7.31 | 2.65 |
| Er-a-7  | 75 | 0.445 | 0.133 | 0.030 | 0.4255 | 0.0479 | 0.11 | -    | 7.06 | 2.54 |
| Er-a-8  | 75 | 0.445 | 0.139 | 0.030 | 0.4320 | 0.0372 | 0.09 | -    | 6.93 | 2.44 |
| Er-a-9  | 75 | 0.445 | 0.151 | 0.030 | 0.4192 | 0.0417 | 0.10 | -    | 7.00 | 2.23 |
| Er-a-10 | 75 | 0.446 | 0.177 | 0.030 | 0.4347 | 0.0326 | 0.07 | -    | 6.86 | 1.92 |
| Er-a-11 | 75 | 0.447 | 0.201 | 0.030 | 0.4289 | 0.0299 | 0.07 | -    | 6.82 | 1.69 |
| Er-a-12 | 75 | 0.445 | 0.227 | 0.030 | 0.4306 | 0.0210 | 0.05 | -    | 6.63 | 1.50 |
| Er-a-13 | 75 | 0.443 | 0.256 | 0.030 | 0.4388 | 0.0187 | 0.04 | -    | 6.56 | 1.33 |
| Er-b-0  | 75 | 0.449 | 0.000 | 0.030 | 0.1200 | 0.8344 | 6.94 | -    | 9.19 | -    |
| Er-b-1  | 75 | 0.450 | 0.050 | 0.030 | 0.1376 | 0.7526 | 5.47 | -    | 9.00 | 2.29 |
| Er-b-2  | 75 | 0.450 | 0.075 | 0.030 | 0.1789 | 0.6509 | 3.64 | -    | 8.74 | 2.82 |
| Er-b-3  | 75 | 0.451 | 0.101 | 0.030 | 0.2817 | 0.3890 | 1.38 | -    | 8.23 | 2.94 |
| Er-b-4  | 75 | 0.451 | 0.114 | 0.030 | 0.3562 | 0.1935 | 0.54 | -    | 7.79 | 2.85 |
| Er-b-5  | 75 | 0.450 | 0.120 | 0.030 | 0.3680 | 0.1257 | 0.34 | -    | 7.58 | 2.78 |
| Er-b-6  | 75 | 0.451 | 0.126 | 0.030 | 0.4086 | 0.0261 | 0.06 | -    | 6.78 | 2.72 |
| Er-b-7  | 75 | 0.451 | 0.132 | 0.030 | 0.3978 | 0.0525 | 0.13 | -    | 7.14 | 2.57 |
| Er-b-8  | 75 | 0.450 | 0.139 | 0.030 | 0.3946 | 0.0307 | 0.08 | -    | 6.88 | 2.46 |
| Er-b-9  | 75 | 0.451 | 0.151 | 0.030 | 0.3928 | 0.0330 | 0.08 | -    | 6.92 | 2.25 |
| Er-b-10 | 75 | 0.450 | 0.177 | 0.030 | 0.3907 | 0.0154 | 0.04 | -    | 6.52 | 1.94 |
| Er-b-11 | 75 | 0.451 | 0.202 | 0.030 | 0.4167 | 0.0173 | 0.04 | -    | 6.55 | 1.70 |
| Er-b-12 | 75 | 0.450 | 0.227 | 0.030 | 0.4124 | 0.0077 | 0.02 | -    | 5.99 | 1.52 |

|         |    |       |       |       |        |        |      |      |      |      |
|---------|----|-------|-------|-------|--------|--------|------|------|------|------|
| Er-c-0  | 75 | 0.446 | 0.000 | 0.030 | 0.1210 | 0.8678 | 7.18 | 9.29 | 9.22 | -    |
| Er-c-1  | 75 | 0.444 | 0.050 | 0.030 | 0.1565 | 0.7714 | 4.93 | 9.01 | 8.93 | 3.43 |
| Er-c-2  | 75 | 0.445 | 0.076 | 0.030 | 0.1961 | 0.6623 | 3.38 | 8.84 | 8.70 | 3.27 |
| Er-c-3  | 75 | 0.445 | 0.102 | 0.030 | 0.2957 | 0.4037 | 1.37 | 8.34 | 8.22 | 3.15 |
| Er-c-4  | 75 | 0.446 | 0.115 | 0.030 | 0.3880 | 0.1681 | 0.43 | 7.79 | 7.69 | 3.08 |
| Er-c-5  | 75 | 0.446 | 0.120 | 0.030 | 0.4081 | 0.1058 | 0.26 | 7.61 | 7.45 | 2.99 |
| Er-c-6  | 75 | 0.446 | 0.126 | 0.030 | 0.4253 | 0.0447 | 0.11 | 7.04 | 7.03 | 2.89 |
| Er-c-7  | 75 | 0.446 | 0.133 | 0.030 | 0.4380 | 0.0187 | 0.04 | 6.42 | 6.56 | 2.76 |
| Er-c-8  | 75 | 0.445 | 0.140 | 0.030 | 0.4376 | 0.0164 | 0.04 | 6.24 | 6.48 | 2.62 |
| Er-c-9  | 75 | 0.445 | 0.152 | 0.030 | 0.4273 | 0.0231 | 0.05 | 6.28 | 6.69 | 2.41 |
| Er-c-10 | 75 | 0.446 | 0.177 | 0.030 | 0.4336 | 0.0172 | 0.04 | 6.20 | 6.52 | 2.08 |
| Er-c-11 | 75 | 0.446 | 0.203 | 0.030 | 0.4369 | 0.0131 | 0.03 | 6.16 | 6.35 | 1.82 |
| Er-c-12 | 75 | 0.446 | 0.228 | 0.030 | 0.4325 | 0.0080 | 0.02 | 6.11 | 5.98 | 1.62 |
| Er-c-13 | 75 | 0.447 | 0.252 | 0.030 | 0.4452 | 0.0106 | 0.02 | 6.12 | 6.19 | 1.46 |
| Er-d-0  | 75 | 0.445 | 0.000 | 0.030 | 0.1200 | 0.8724 | 7.27 | 9.38 | 9.24 | -    |
| Er-d-1  | 75 | 0.445 | 0.051 | 0.030 | 0.1537 | 0.7904 | 5.14 | 9.09 | 8.96 | 3.26 |
| Er-d-2  | 75 | 0.446 | 0.075 | 0.030 | 0.1907 | 0.6964 | 3.65 | 8.83 | 8.74 | 3.24 |
| Er-d-3  | 75 | 0.445 | 0.101 | 0.030 | 0.2735 | 0.4796 | 1.75 | 8.37 | 8.35 | 3.16 |
| Er-d-4  | 75 | 0.446 | 0.114 | 0.030 | 0.3562 | 0.2654 | 0.75 | 7.97 | 7.94 | 3.09 |
| Er-d-5  | 75 | 0.445 | 0.120 | 0.030 | 0.3976 | 0.1415 | 0.36 | 7.61 | 7.60 | 3.05 |
| Er-d-6  | 75 | 0.446 | 0.126 | 0.030 | 0.4193 | 0.0692 | 0.17 | 7.09 | 7.24 | 2.94 |
| Er-d-7  | 75 | 0.446 | 0.132 | 0.030 | 0.4280 | 0.0391 | 0.09 | 6.56 | 6.96 | 2.83 |
| Er-d-8  | 75 | 0.446 | 0.139 | 0.030 | 0.4347 | 0.0383 | 0.09 | 6.28 | 6.94 | 2.69 |
| Er-d-9  | 75 | 0.445 | 0.152 | 0.030 | 0.4275 | 0.0367 | 0.09 | 6.17 | 6.93 | 2.47 |
| Er-d-10 | 75 | 0.445 | 0.177 | 0.030 | 0.4351 | 0.0245 | 0.06 | 6.11 | 6.71 | 2.12 |
| Er-d-11 | 75 | 0.440 | 0.212 | 0.030 | 0.4416 | 0.0251 | 0.06 | 6.06 | 6.72 | 1.77 |
| Er-d-12 | 75 | 0.446 | 0.227 | 0.030 | 0.4387 | 0.0140 | 0.03 | 6.05 | 6.39 | 1.66 |
| Er-d-13 | 75 | 0.446 | 0.252 | 0.030 | 0.4475 | 0.0150 | 0.03 | 6.04 | 6.42 | 1.49 |
